# Supplementary material for: Three-dimensional organoid culture reveals involvement of Wnt/β-catenin pathway in proliferation of bladder cancer cells
Source: PubMed Central journal article supplement (PMC5834271; doi:10.18632/oncotarget.24308), 2018-01-24
Supplement: oncotarget-09-11060-s001.pdf [file oncotarget-09-11060-s001.pdf]

## Three-dimensional organoid culture reveals involvement of Wnt/ $\beta$ -catenin pathway in proliferation of bladder cancer cells

### SUPPLEMENTARY MATERIALS

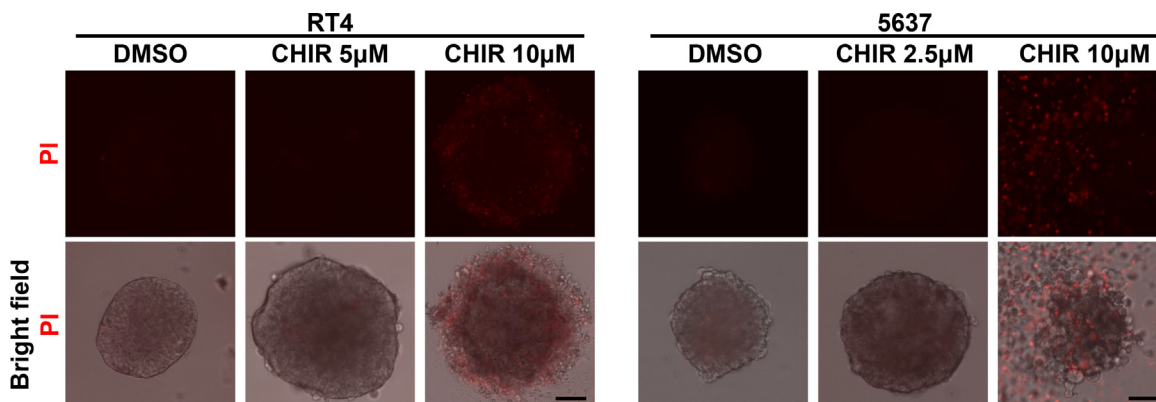

**Supplementary Figure 1: CHIR at high dose induces cell death in RT4- and 5637-derived organoids.** RT4- and 5637-derived organoids were treated with DMSO or CHIR of the indicated concentration for 5 days, and were incubated with propidium iodide (PI). Fluorescent images of PI and images merged with bright-field are shown. Scale bar, 100  $\mu$ m.

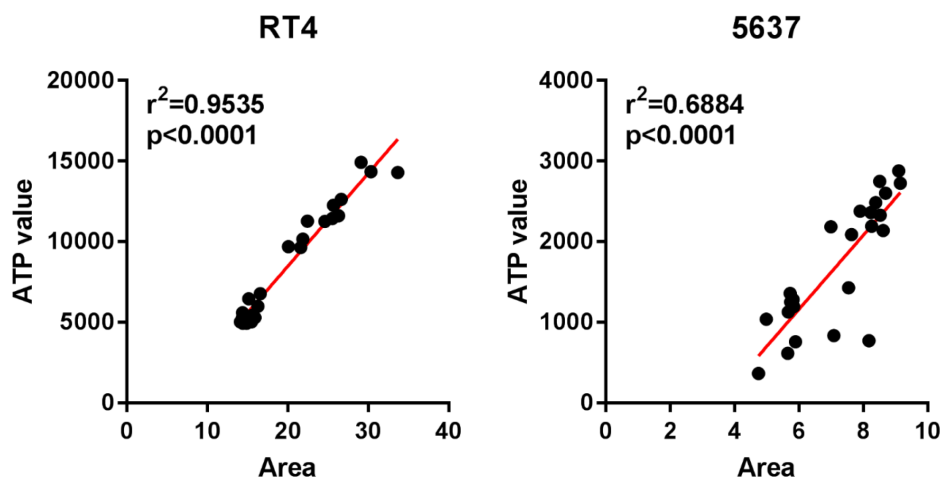

**Supplementary Figure 2: The ATP value of cell line-derived organoids correlates with the area after treatment of DMSO or CHIR.** RT4- and 5637-derived organoids were treated with DMSO or CHIR for 5 days, and ATP value of the organoids were measured. Correlation of the area and ATP value measured on the same day was examined by linear regression.

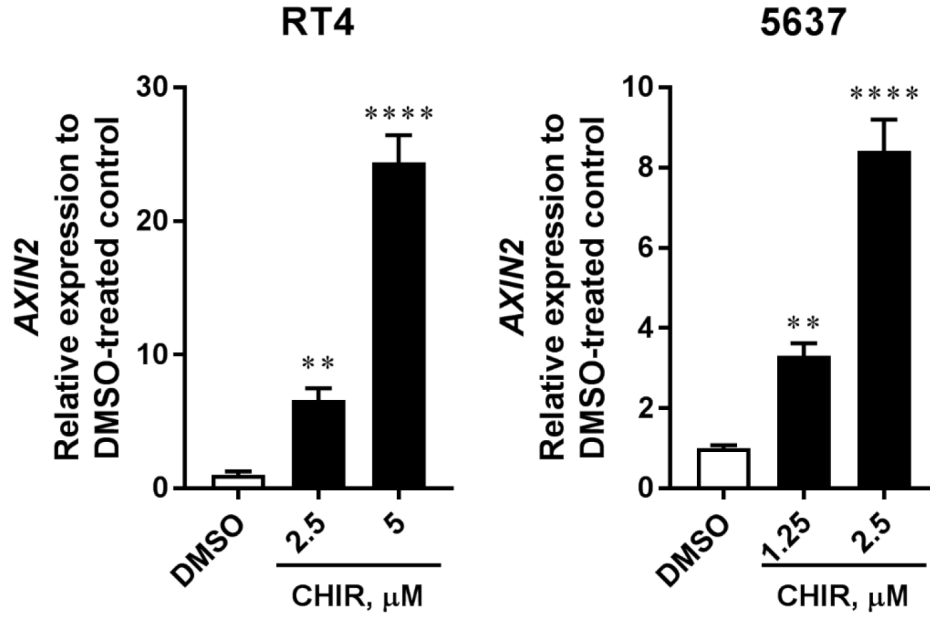

**Supplementary Figure 3: CHIR upregulates AXIN2 expression in RT4- and 5637-derived organoids in a dose-dependent manner.** Bar graphs show the relative gene expression of AXIN2 measured by qRT-PCR in RT4- and 5637-derived organoids treated with DMSO, or CHIR of the indicated concentration for 24 hours. GAPDH was used as a reference gene, and relative expression was calculated by the  $2^{-\Delta\Delta CT}$  method. \*\* $P \leq 0.01$ . \*\*\*\* $P \leq 0.0001$ .

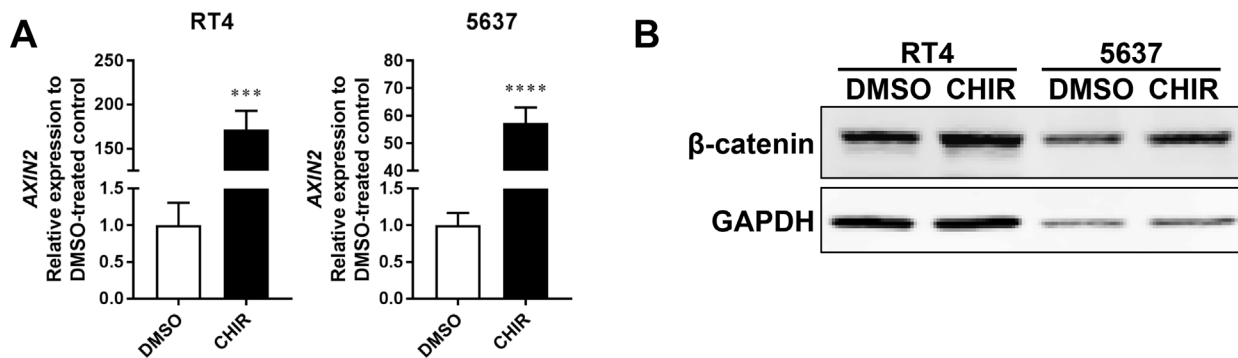

**Supplementary Figure 4: CHIR activates the Wnt/ $\beta$ -catenin pathway in bladder cancer cell lines in 2D adherent culture.** (A) Bar graphs show the relative gene expression of AXIN2 by qRT-PCR in RT4 and 5637 treated with DMSO, or 5 and 2.5  $\mu$ M of CHIR for 24 hours in adherent culture, respectively. GAPDH was used as a reference gene, and relative expression was calculated by the  $2^{-\Delta\Delta CT}$  method. (B) Western blot analysis shows protein levels of  $\beta$ -catenin and GAPDH in RT4 and 5637 treated with DMSO, or 5 and 2.5  $\mu$ M of CHIR for 24 hours in adherent culture, respectively. GAPDH was used as a loading control. \*\*\* $P \leq 0.001$ . \*\*\*\* $P \leq 0.0001$ .

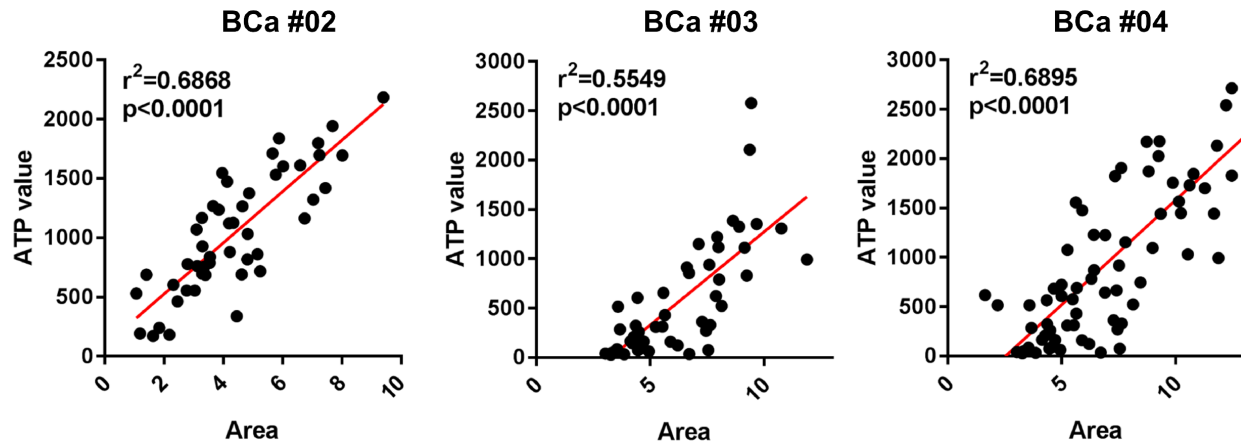

**Supplementary Figure 5: The ATP value of patient-derived organoids correlates with the area after treatment of DMSO or CHIR.** Organoids derived from 3 patient samples were treated with DMSO or CHIR for 5 days, and ATP value of the organoids were measured. Correlation of the area and ATP value measured on the same day was examined by linear regression.

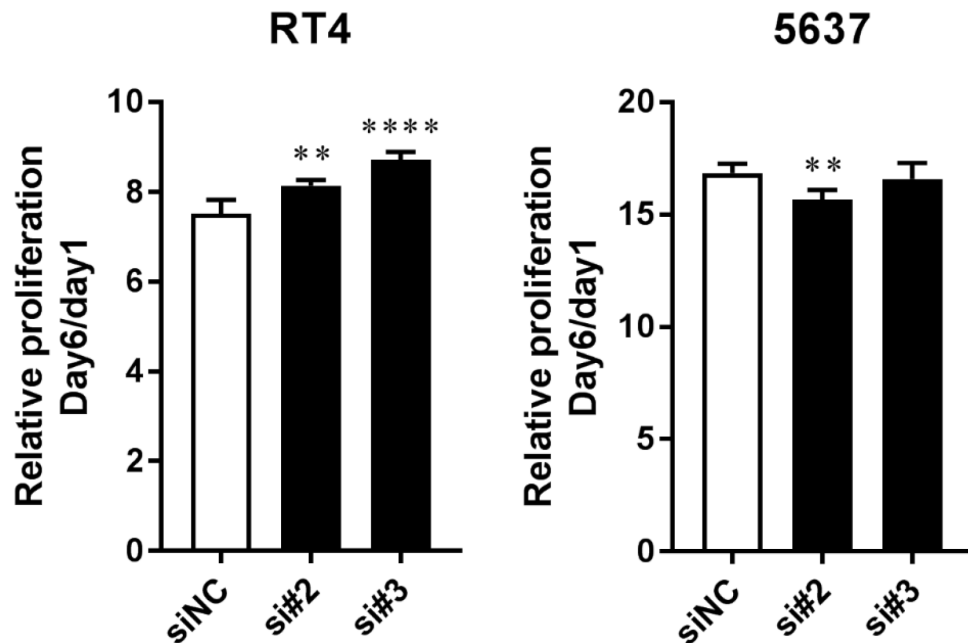

**Supplementary Figure 6: Gene silencing of  $\beta$ -catenin slightly affects proliferation of bladder cancer cells in 2D adherent culture.** RT4 and 5637 were transiently transfected with si-Control or si-CTNNB1. Transfected cells were plated in a 96 well plate. Viability of cells were measured using CellTiter-Glo Luminescent Cell Viability Assay (Promega) at 24 and 144 hours after seeding. Relative proliferation was calculated by dividing ATP value of 24 hours by that of 144 hours. \*\* $P \leq 0.01$ . \*\*\*\* $P \leq 0.0001$ .

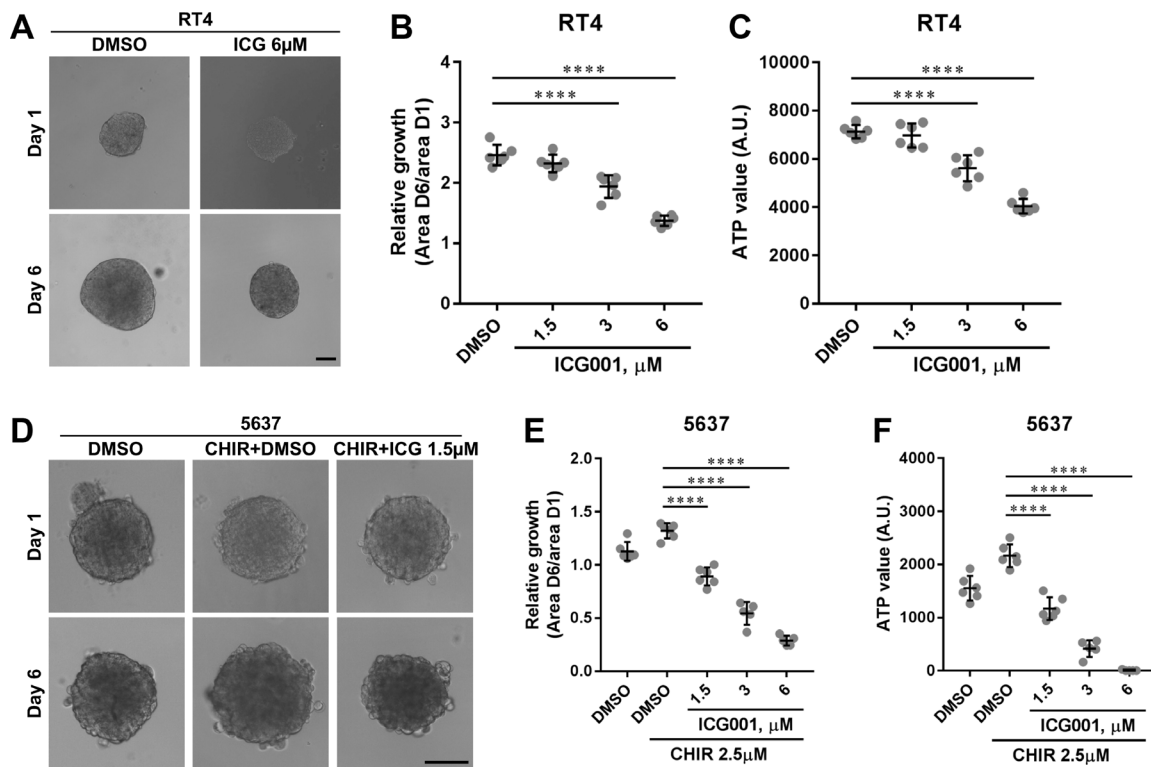

**Supplementary Figure 7: ICG-001 suppresses intrinsic growth of RT4-derived organoids and CHIR-induced growth of 5637-derived organoids.** (A) Representative images of RT4-derived organoids at day 1 and day 6 treated with DMSO or ICG-001 of the indicated concentration. Scale bar, 100  $\mu$ m. (B) Relative growth of RT4-derived organoids was calculated by dividing area at day 6 by that at day 1, and depicted in the plot. (C) Viability of RT4-derived organoids at day 6 was measured by quantifying the amount of ATP, and depicted in the plot. (D) Representative images of 5637-derived organoids at day 1 and day 6 treated with DMSO, or CHIR and ICG001 of the indicated concentration. Scale bar, 100  $\mu$ m. (E, F) Relative growth and viability of 5637-derived organoids at day 6 was depicted in the plot, respectively. \*\*\*\* $P \leq 0.0001$ .

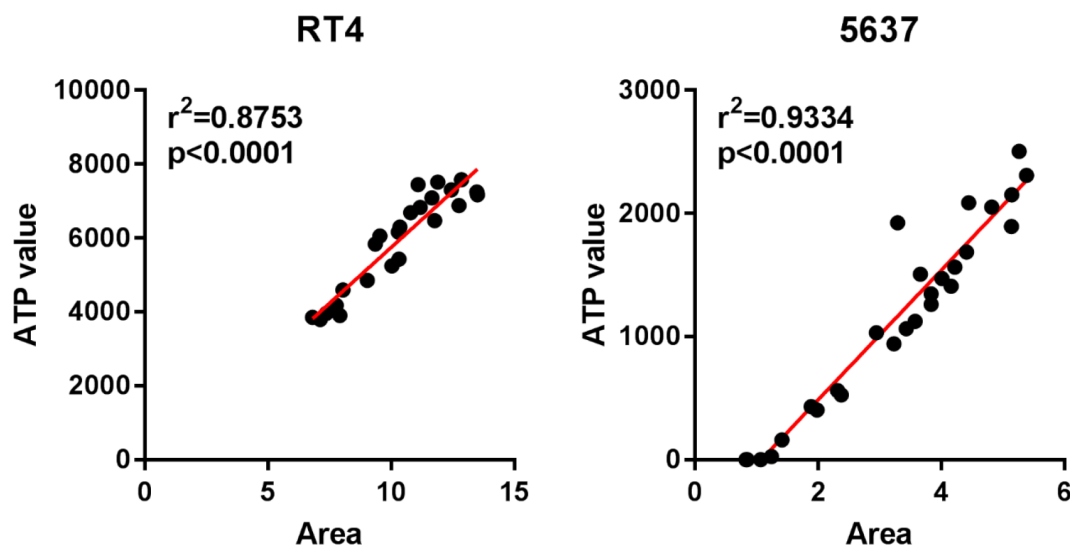

**Supplementary Figure 8: The ATP value of cell line-derived organoids correlates with the area after treatment of DMSO or ICG001.** RT4- and 5637-derived organoids were treated with DMSO or ICG001 for 5 days, and ATP value of the organoids were measured. Correlation of the area and ATP value measured on the same day was examined by linear regression.

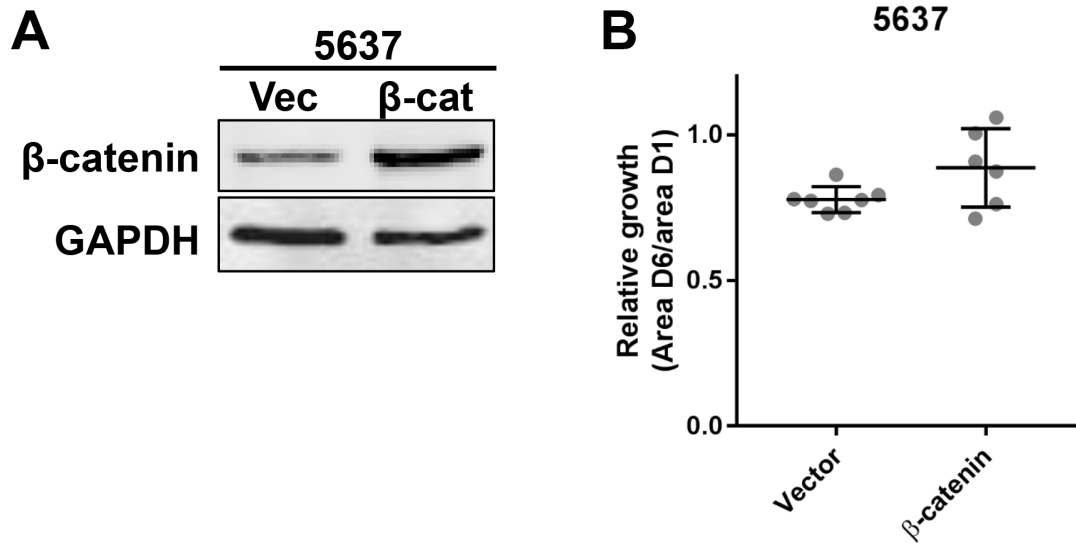

**Supplementary Figure 9:  $\beta$ -catenin overexpression does not enhance growth of bladder cancer organoids.** (A) 5637 was transfected with pCMV6-XL5 or pCMV6-CTNNB1 (SC107921, OriGene, Rockville, MD) using Lipofectamine 2000 (Thermo Fisher Scientific). Western blot analysis shows increased expression of  $\beta$ -catenin after transfection of the overexpressing plasmid. GAPDH was used as a loading control. (B) Images of organoids were captured on day 1 and 6. Relative growth was calculated by dividing area of day 6 by that of day 1. Each dot represents one organoid assessed.
